# Supplementary material for: Identification, diversity and domain structure analysis of mucin and mucin-like genes in sea anemone Actinia tenebrosa
Source: PeerJ journal article supplement (doi:10.7717/peerj.13292), 2022-05-05
Supplement: Appendix_._Supplementary_materials.pdf [file Appendix_._Supplementary_materials.pdf]

Identification, diversity and domain structure analysis of mucin and mucin-like genes in sea anemone *Actinia tenebrosa*

**Supplementary file:**

Sequences read accession numbers, Table 1. Assembly statistics, Table2. Annotations, Table 3. Identification of *A. tenebrosa* mucin candidates from (Red, Green, Blue, and Brown colour-morph) Table 4 – Table 7. Mucin domains definitions, Table8. Mucin1-like and Mucin4-like diversity, Table 9, and Table 10. Annotation GO terms using WEGO, Figure 1 – Figure 4. Partial mucins sequences, Figure 5. Mucin1-like domain architectures, Figure 6. Mucin4-like domain architectures, Figure 7.

**Supplementary Table 1 | Sequences read accession numbers.** The raw RNA sequence reads accession numbers at the National centre of biotechnology information for the four *A. tenebrosa* colour-morph transcriptomes

| <b>Transcriptome</b>                     | <b>SRA accession</b> |
|------------------------------------------|----------------------|
| <i>A. tebebroso</i> (Red colour-morph)   | SRR3216075           |
| <i>A. tenebroso</i> (Green colour-morph) | SRR3206038           |
| <i>A. tenebroso</i> (Brown colour-morph) | SRR3207346           |
| <i>A. tenebroso</i> (Blue colour-morph)  | SRR3207346           |

**Supplementary Table 2 | Assembly statistics.** The assembly statistic data generated from the four *A. tenebrosa* transcriptomes.

| <b>Quality metrics</b>     | <b>Red</b>  | <b>Green</b> | <b>Blue</b> | <b>Brown</b> |
|----------------------------|-------------|--------------|-------------|--------------|
| Total reads                | 152,136,760 | 179,309,262  | 175,687,690 | 201,995,450  |
| Total assembled base pairs | 88,116,072  | 86,177,706   | 83,348,231  | 98,585,782   |
| Number of transcripts      | 111,882     | 105,145      | 87,137      | 122,362      |
| N50                        | 1,478 bp    | 1609 bp      | 1,770 bp    | 1,600 bp     |
| Average contig length      | 787.58 bp   | 819.6 bp     | 956.52 bp   | 805.69 bp    |
| Maximum length             | 30,441 bp   | 30457 bp     | 31384 bp    | 32,195 bp    |
| <b>CEGMA</b>               |             |              |             |              |
| Full length sequences (%)  | 92.3        | 96.8         | 97.98       | 95.6         |
| CEGs (%)                   | 96.4        | 98.4         | 98.79       | 98.4         |

**Supplementary Table 3 | Annotation results.** The table show total number of contigs that received BLASTx and BLASTp hits across the four *A. tenebrosa* colourmorphs

| <b>Colourmorphs</b> | <b>BLASTx hit</b> | <b>BLASTp hit</b> |
|---------------------|-------------------|-------------------|
| <b>Red</b>          | 46,904            | 38,274            |
| <b>Green</b>        | 47,370            | 27,471            |
| <b>Blue</b>         | 46,334            | 29,250            |
| <b>Brown</b>        | 64,883            | 37,026            |

**Supplementary Table 4 | Identified mucin1-like, mucin4-like and mucin-like from the red *A. tenebrosa* colourmorph.** The table below shows the contig number, blastx and blastp hits, amino acid, and transcript lengths (bp).

| <b>Contigs number</b> | <b>Mucin</b> | <b>BLASTx<br/>Description</b> | <b>BLASTp<br/>Description</b> | <b>Transcript<br/>length(bp)</b> | <b>Amino<br/>acid length</b> | <b>BLASTx and<br/>BLASTp hit</b> |
|-----------------------|--------------|-------------------------------|-------------------------------|----------------------------------|------------------------------|----------------------------------|
| <b>TR50731 c0_g1</b>  | Mucin1-like  | Non                           | Mucin-1                       | 2040                             | 448                          | Non<br>MUC1_MESAU                |
| <b>TR63507 c0_g3</b>  | Mucin4-like  | Mucin-like<br>protein         | Non                           | 5591                             | 1355                         | MLP_ACRMI<br>Non                 |
| <b>TR63465 c2_g2</b>  | Mucin-like   | Mucin-like<br>protein         | Non                           | 6067                             | 962                          | MLP_ACRMI<br>Non                 |
| <b>TR61953 c2_g3</b>  | Mucin-like   | Mucin-like<br>protein         | Non                           | 2523                             | 716                          | MLP_ACRMI<br>Non                 |
| <b>TR63556 c1_g3</b>  | Mucin-like   | Mucin-like<br>protein         | Non                           | 1234                             | 314                          | MLP_ACRMI<br>Non                 |

**Supplementary Table 5 | Identified mucin1-like, mucin4-like and mucin-like from the green *A. tenebrosa* colourmorph.** The table shows the contig number, blastx and blastp hits, amino acid, and transcript lengths (bp).

| Contigs number | Mucin       | BLASTx<br>Description | BLASTp<br>Description | Transcript<br>length(bp) | Amino<br>acid length | BLASTx and<br>BLASTp hit |
|----------------|-------------|-----------------------|-----------------------|--------------------------|----------------------|--------------------------|
| TR49398 c1_g2  | Mucin1-like | Non                   | Mucin-1               | 2007                     | 454                  | Non<br>MUC1_MESAU        |
| TR43324 c0_g1  | Mucin4-like | Mucin-like<br>protein | Mucin-like<br>protein | 7750                     | 1324                 | MLP_ACRMI<br>MLP_ACRMI   |
| TR50363 c3_g2  | Mucin4-like | Mucin-like<br>protein | Mucin-like<br>protein | 7483                     | 2257                 | MLP_ACRMI<br>MLP_ACRMI   |
| TR50175 c7_g4  | Mucin4-like | Mucin-like<br>protein | Mucin-like<br>protein | 4762                     | 1345                 | MLP_ACRMI<br>MLP_ACRMI   |
| TR50236 c3_g4  | Mucin-like  | Mucin-like<br>protein | Mucin-like<br>protein | 4688                     | 962                  | MLP_ACRMI<br>MLP_ACRMI   |
| TR45099 c4_g13 | Mucin-like  | Mucin-like<br>protein | Non                   | 5515                     | 931                  | MLP_ACRMI<br>Non         |

**Supplementary Table 6 | Identified mucin1-like and mucin4-like from the blue *A. tenebrosa* colourmorph.** The table shows the contig number, blastx and blastp hits, amino acid, and transcript lengths (bp).

| Contigs number | Mucin       | BLASTx<br>Description | BLASTp<br>Description | Transcript<br>length(bp) | Amino<br>acid length | BLASTx and<br>BLASTp hit |
|----------------|-------------|-----------------------|-----------------------|--------------------------|----------------------|--------------------------|
| TR24970 c9_g2  | Mucin1-like | Non                   | Mucin-1               | 1977                     | 454                  | Non<br>MUC1_MESAU        |
| TR26748 c2_g1  | Mucin4-like | Mucin-like<br>protein | Mucin-like<br>protein | 5873                     | 1332                 | MLP_ACRMI<br>MLP_ACRMI   |
| TR24768 c4_g2  | Mucin4-like | Mucin-like<br>protein | Mucin-like<br>protein | 5594                     | 1353                 | MLP_ACRMI<br>MLP_ACRMI   |
| TR20060 c1_g1  | Mucin4-like | Mucin-like<br>protein | Mucin-like<br>protein | 7551                     | 2269                 | MLP_ACRMI<br>MLP_ACRMI   |

**Supplementary Table 7 | Identified mucin1-like and mucin4-like from the brown *A. tenebrosa* colourmorph.** The table shows the contig number, blastx and blastp hits, amino acid, and transcript lengths (bp).

| Contigs number | Mucin       | BLASTx<br>Description | BLASTp<br>Description | Transcript<br>length(bp) | Amino acid<br>length | BLASTx and<br>BLASTp hit |
|----------------|-------------|-----------------------|-----------------------|--------------------------|----------------------|--------------------------|
| TR57482 c19_g3 | Mucin1-like | Non                   | Mucin-1               | 2063                     | 454                  | MUC1_MESAU               |
| TR56459 c5_g1  | Mucin4-like | Mucin-like<br>protein | Mucin-like<br>protein | 7734                     | 1324                 | MLP_ACRMI<br>MLP_ACRMI   |
| TR58560 c7_g11 | Mucin4-like | Mucin-like<br>protein | Mucin-like<br>protein | 7487                     | 2099                 | MLP_ACRMI<br>MLP_ACRMI   |
| TR59496 c2_g1  | Mucin4-like | Mucin-like<br>protein | Mucin-like<br>protein | 7470                     | 2268                 | MLP_ACRMI<br>MLP_ACRMI   |



**Supplementary Table 8 | Mucin domains definition.** Table below shows the functional conserved mucin domains found in the structures of *A. tenebrosa* identified mucin1-like and mucin4-like, including the definition for each protein domain.

| <b>Pfam domains</b> | <b>Definition</b>                              |
|---------------------|------------------------------------------------|
| SEA                 | Sea urchin sperm protein, Enterokinase, Agrin. |
| VWD                 | Von Willebrand factor type D domain            |
| NIDO                | Nidogen-like                                   |
| AMOP                | Adhesion-associated domain                     |
| TM                  | Transmembrane helix region/domain              |
| ZP                  | Zona pellucida domain                          |
| CUB                 | Complement C1r/C1s, Uegf, Bmp1 domain          |
| FN3                 | Fibronectin type 3 domain                      |
| EGF                 | Epidermal growth factor-like domain            |
| LC                  | Low compositional complexity region            |
| SP                  | Signal peptide                                 |

**Supplementary Table 9 | Mucin1-like diversity.** This table shows mucin1-like information across cnidarian tested species, generated from blasting *A. tenebrosa* mucin1-like against cnidarian species. It was found that the *A. tenebrosa* mucin1-like presented as a full-length sequence in all cnidarian tested species, with differential in the identical percent, amino acid sequence length and presence of N terminus signal peptide and C terminus domains. The √ refers to presence, while × refers to absence

| Cnidarian species       | Sequence full length | Identical % | Amino acid length | N-terminus signal peptide | C-terminus SEA domains |
|-------------------------|----------------------|-------------|-------------------|---------------------------|------------------------|
| <i>A. veratra</i>       | √                    | 61.42%      | 316               | ×                         | √                      |
| <i>A. pallida</i>       | √                    | 43%         | 387               | √                         | √                      |
| <i>C. polypus</i>       | √                    | 44.86%      | 200               | ×                         | √                      |
| <i>N. annamensis</i>    | √                    | 45.23%      | 200               | √                         | √                      |
| <i>A. elegantissima</i> | √                    | 71.69%      | 321               | ×                         | √                      |

---

|                      |   |     |     |   |   |
|----------------------|---|-----|-----|---|---|
| <i>A. digitifera</i> | √ | 33% | 449 | √ | √ |
| <i>O. faveolate</i>  | √ | 36% | 548 | √ | √ |

---

**Supplementary Table 10 | Mucin4-like diversity.** The following table shows mucin4-like information across cnidarian tested species, generated from blasting *A. tenebrosa* mucin4-like against cnidarian species. It was found that the *A. tenebrosa* mucin4-like presented as a full-length sequence in all cnidarian tested species, with differential in the identical percent, amino acid sequence length and presence of N terminus signal peptide and C terminus domain collections. The √ refers to presence, while × refers to absence.

| Cnidarian species       | Sequence full length | Identical % | Amino acid length | N-terminus signal peptide | C-terminus NIDO-AMOP-VWD domains |
|-------------------------|----------------------|-------------|-------------------|---------------------------|----------------------------------|
| <i>A. veratra</i>       | √                    | 65.36%      | 1345              | ×                         | √                                |
| <i>A. pallida</i>       | √                    | 40%         | 2321              | √                         | √                                |
| <i>C. polypus</i>       | √                    | 48.89%      | 1398              | ×                         | √                                |
| <i>N. annamensis</i>    | √                    | 44.42%      | 2257              | √                         | √                                |
| <i>A. elegantissima</i> | √                    | 72.55%      | 2286              | √                         | √                                |
| <i>A. elegantissima</i> | ×                    | 74.64%      | 2164              | √                         | √                                |
| <i>A. digitifera</i>    | √                    | 40%         | 1306              | ×                         | √                                |
| <i>O. faveolate</i>     | √                    | 45%         | 1416              | ×                         | √                                |

---

|                       |   |        |      |   |   |
|-----------------------|---|--------|------|---|---|
| <i>Telmatactis sp</i> | √ | 40.52% | 1456 | √ | √ |
| <i>A. buddemeieri</i> | √ | 66.48% | 2171 | × | √ |

---

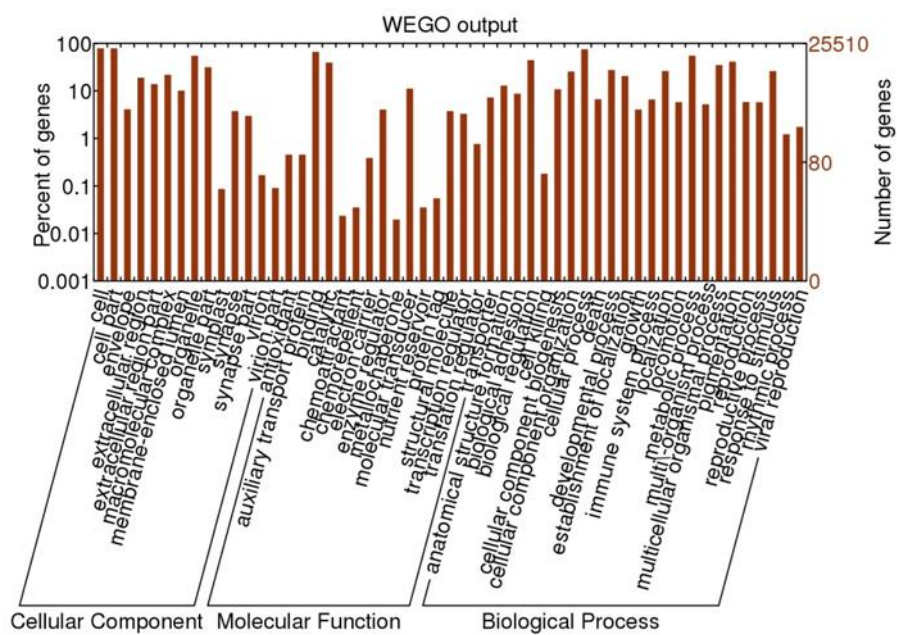

**Supplementary Figure 1 | WEGO plots.** The distributions of red *A. tenebrosa* gene ontology terms across GO three main categories, Cellular component, Molecular function, and Biological process.

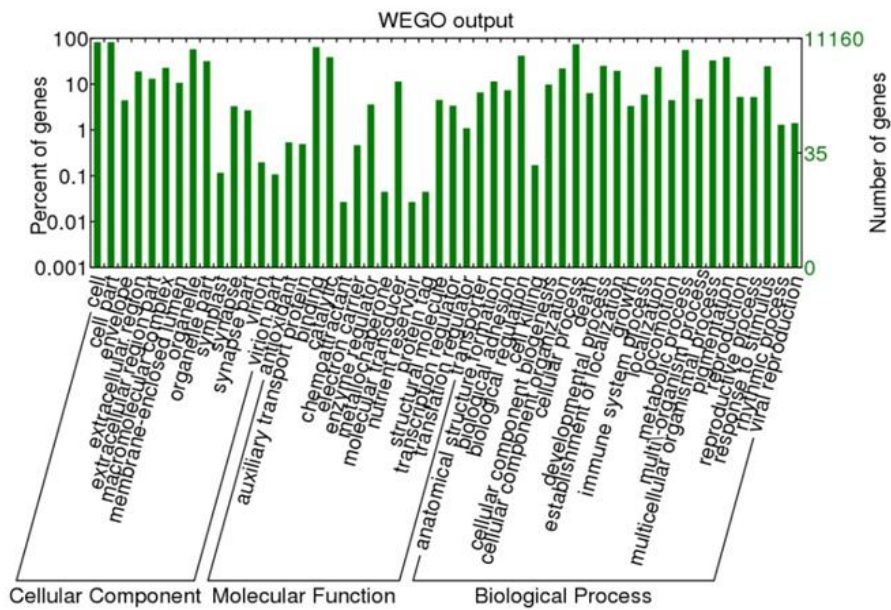

**Supplementary Figure 2 | WEGO plots.** The distributions of green *A. tenebrosa* gene ontology terms across GO three main categories, Cellular component, Molecular function, and Biological process.

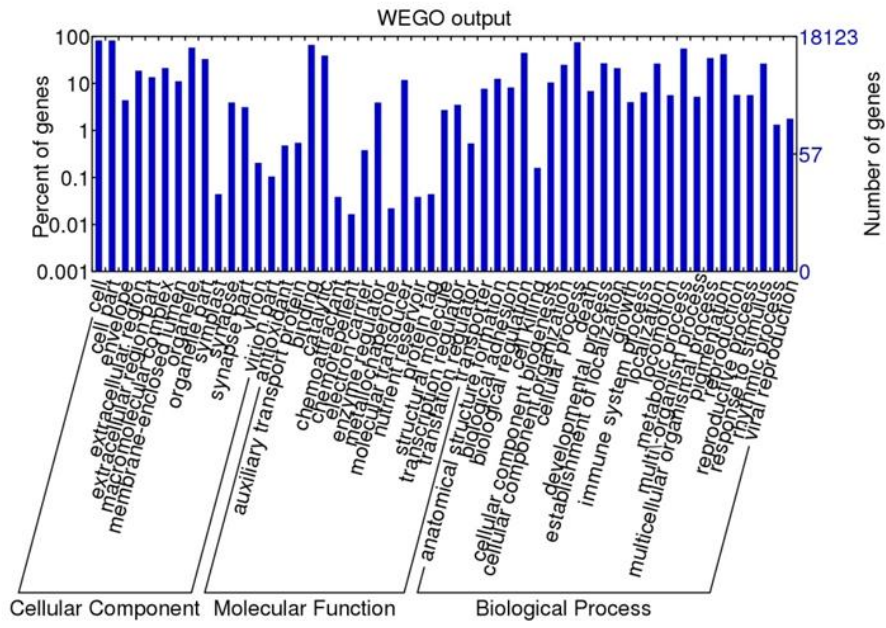

**Supplementary Figure 3 | WEGO plots.** The distributions of blue *A. tenebrosa* gene ontology terms across GO three main categories, Cellular component, Molecular function, and Biological process.



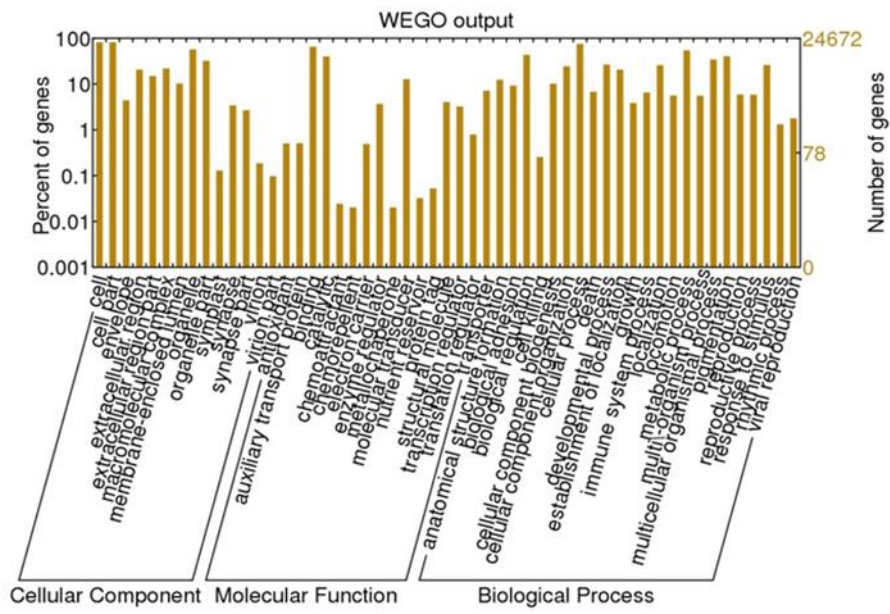

**Supplementary Figure 4 | WEGO plots.** The distributions of brown *A. tenebrosa* gene ontology terms across GO three main categories, Cellular component, Molecular function, and Biological process.

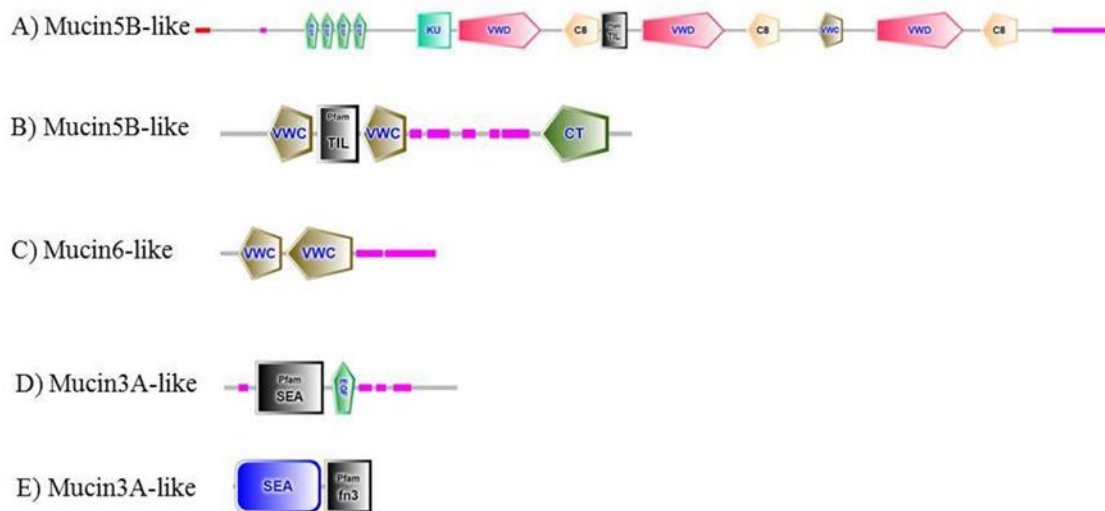

**Supplementary Figure 5 | Partial mucins sequences.** Figure show the domain structure organisations of the excluded partial identified tow mucin5B-like, mucin6-like and mucin3A-like from the red, green, blue and brown *A. tenebrosa* colourmorphs based on SMART visualisation. A) Partial mucin5B-like structure representing the N-terminus domains and lack of C terminus; B) Partial mucin5B-like structure representing the C-terminus domains and lack of N terminus; C) Partial mucin6-like structure with lack of both N and C terminuses; D) and E) Partial mucin3A-like structures with lack of N and C terminuses.

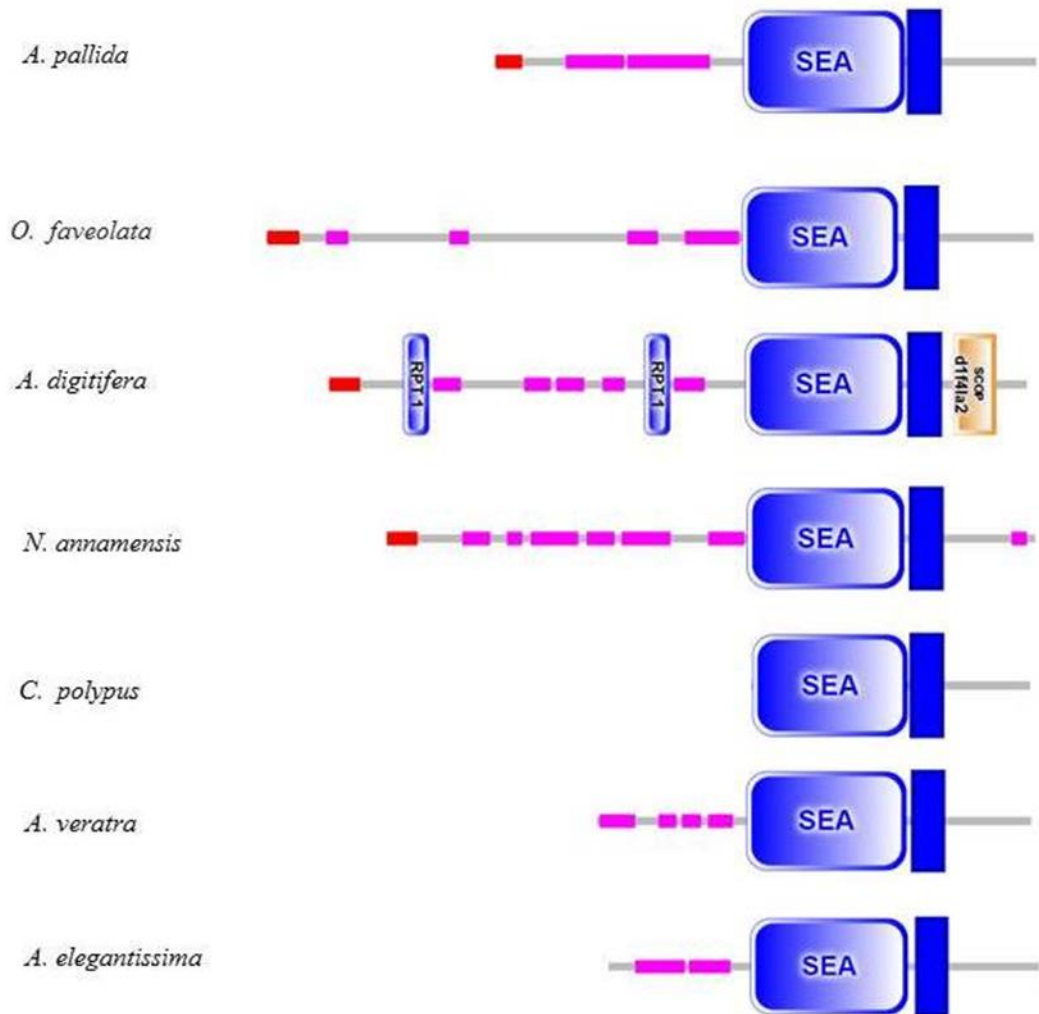

**Supplementary Figure 6 | Mucin1-like domain architectures.** The figure shows mucin1-like protein domain architectures from the tested cnidarian species based on SMART visualisation. The protein domain structures of MUC1, including a single SEA domain followed by a transmembrane domain on the C-terminus, presented in all tested cnidarian species. The N-terminus indicated by the signal peptide was absent in mucin1-like of some species. The number and size of the low complexity regions were varied among the mucin1-like of cnidarian species.

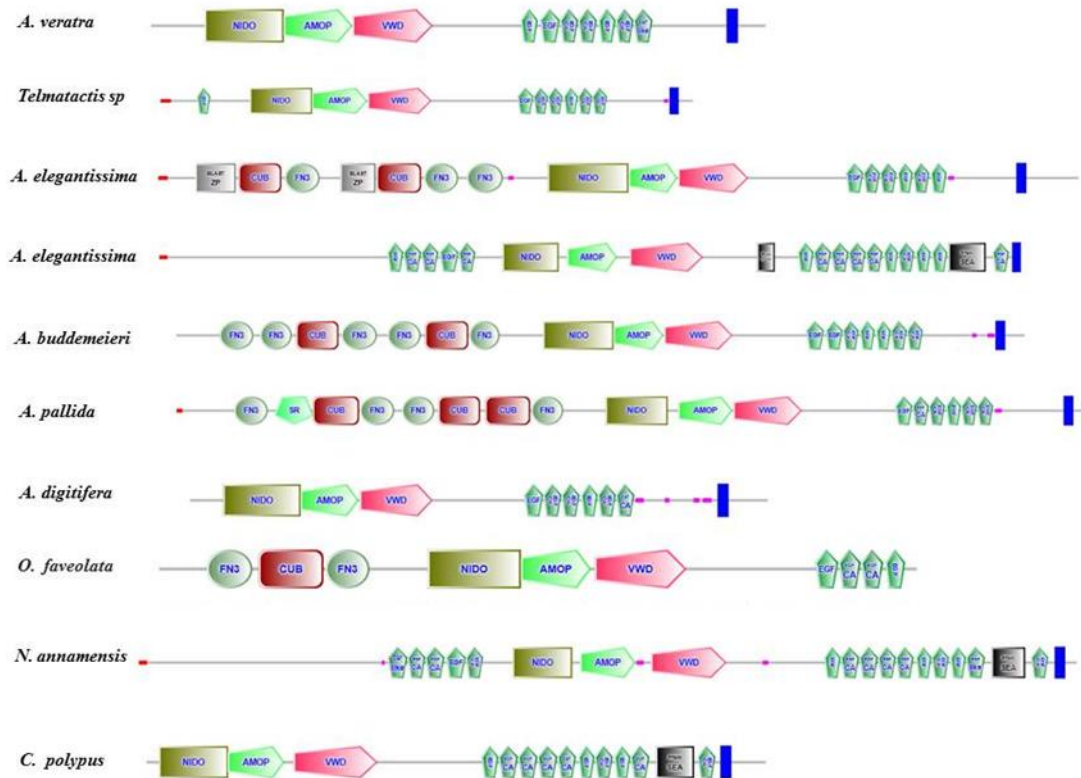

**Supplementary Figure 7 | Mucin4-like domain architectures.** The figure shows protein domain architectures for mucin4-like genes across the tested cnidarian species based on SMART visualisation. The MUC4 domain structure, including NIDO, AMOP and VWD domains, were presented in most species. *A. tenebrosa* mucin4-like additional domains in the N-terminus were presented only in mucin4-like of *A. elegantissima*, *A. buddemeieri*, *A. pallida* and *O. faveolata*, while the additional single SEA domain in the C-terminus presented only in the C-terminus of *A. elegantissima*, *N. annamensis* and *C. polypus*. The N-terminus indicated by the signal peptide was absent in some sequences.
